# Supplementary material for: Quantifying Ant Activity Using Vibration Measurements
Source: PLOS journal article supplement (doi:10.1371/journal.pone.0090902), 2014-03-21
Supplement: S4 (10.1371/journal.pone.0090902.s004) [file journal.pone.0090902.s004]

# Supplementary Information A Preparatory experiment: Mobility of veneer disc

## Materials and Methods

In order to use two assembled ant-boxes with different veneer discs in the vibration bioassay experiments the veneer discs' modal behaviour without ants has been assessed. The veneer discs had a weight difference of less than 4 %. The veneer disc in the ant-box **1** (used later on treatment side in container 1, called **X** in the following), had a weight of 1.4212 g; cf. veneer disc in the ant-box **2** (used later on control side in container 1, called **Y** in the following) of 1.3659 g. The second containers remained empty throughout the experiment.

**Figure S1. Experimental setup to measure the mobility of the veneer disc in the ant-box's lid.** Scanning laser vibrometer (PSV-400); loudspeaker; and ant-box minus rectangular container, Figure 1, main document.

The vibration response of the the veneer disc in the two ant-boxes were measured for three different systems, **1** veneer disc only, **2** veneer disc plus PVC tubes in ant-boxes and lid; and **3** as for **2** with an additional weight (BLUE TACK, 0.849 g) in the middle of the veneer to mimic a load of both 15 ants (around 0.342 g,) plus the accelerometer load (mean of 0.7 g,  $n = 5$ ). The setup as used for (3) but with accelerometers instead of BLUE TACK would be the one used later on for the vibration bioassays with live ants.

**Figure S2. Characterisation of veneer discs over mobilities.** Mobilities measured for systems **1**, **2** and **3**;  $X_i$  and  $Y_i$  stand for the veneer discs' later use as control and treatment sides of system  $i = 1, 2, 3$ , respectively

The vibration velocities on the veneer discs' surfaces were measured with a laser vibrometer (POLYTEC PSV-400 & POLYTEC Analysis Software 8.8; Figure S1) using complex averaging ( $n = 20$ ), a HANN window, anti-aliasing filter and a concentrical measurement grid of 81 nodes on each veneer disc. The empty ant-boxes were excited using a loudspeaker (RADIOSHACK REALISTIC MINIMUS 7) via sweeping a signal of 0.3 s length ranging from 1 to 7000 Hz driven with 10 V delayed by 1/10 s. The loudspeaker was placed 150 mm away from the setup with the woofer centered on container 1 (n.b. the woofer's frequency response is given with 55 – 5000 Hz). Non-contact excitation (loudspeaker) and measurement

23 (vibrometer) was preferred owing to the ant-boxes' light-weight structured lid-assemblies (about 157.71  
 24 g). As the distance between the speaker and the lid-assembly is 150 mm, the sound wave propagation  
 25 is that of a spherical wave. Thus, as a first order approximation the lid-assembly was only excited by a  
 26 plane wave for frequencies above 400 Hz [1]. The mobility was calculated as the ratio of the averaged  
 27 measured vibration velocity relative to the voltage driving the loudspeaker (reference signal).

## 28 Results

29 Figure S2 gives the mobilities of systems **1**, **2** and **3**;  $X_i$  and  $Y_i$  stand for the veneer disc's later use as  
 30 control and treatment side respectively for systems  $i = \mathbf{1, 2, 3}$ . The differences in the measured mobility  
 31 between the two setups are very similar: 4.35% for system **1**, 10.35% for system **2**, and 6.75% for system  
 32 **3**. The dominant mode of the veneer disc is the  $(1, 0) = (m, n)$  mode, for system **3** 455.3 and 495.3 Hz,  
 33 where  $m$  and  $n$  are the number of nodal circles and the number of radial nodal lines respectively [2].  
 34 It is expected that the ants will also excite this fundamental mode of the lid assembly (ant-box minus  
 35 rectangular container, Figure 1 main document). While for system **2** the response is higher when the  
 36 veneer disc is constrained to the lid assembly acting similar to a drum, the magnitude of the measured  
 37 response for system **3** is reduced.

38 We acquired the laser vibrometer after we had finished the experiment with the B&K accelerometers  
 39 (model 4374), partly because we realised the miniature accelerometers were not sensitive enough for  
 40 some of the ant behaviours. However, in order to conduct the bioassays two laser vibrometers would be  
 41 required and cooling of two laser heads (due to elevated temperatures) would increase the background  
 42 noise/vibration in the anechoic chamber. Hence we did not use laser vibrometers for the bioassays in this  
 43 study.

## 44 Supplementary Information B Background information on discrete wavelet transform (DWT)

45

46 The DWT, is defined as

$$X[n, a^j] = \sum_{i=0}^{N-1} x[i] \phi_j^*[i - n] \quad (1)$$

47 where  $x[n]$  ( $n = 0, \dots, N - 1$ ) is the ant signal,  $s = a^j$  is the scale,  $a = 2$  for dyadic decomposition,  $j$  is  
 48 the discrete level decomposition and  $\phi_j[n]$  is the discrete wavelet

$$\phi_j^*[n] = \frac{1}{\sqrt{a^j}} \phi\left(\frac{n}{a^j}\right) \quad (2)$$

49 which consists of a scaled version of the mother wavelet  $\phi(t)$ , which can be selected to match with the  
 50 expected signal. The discrete wavelet transform DWT is an analysis - synthesis technique for which  $j$   
 51 different time signals  $X[n, a_j]$  of mixed even non-stationary signals with different scale information can  
 52 be separated (e.g. impulses). Most DWT wavelets can be computed in a very efficient way using digital  
 53 filtering techniques (filter banks). Once the undesired part of the signal is identified, wavelet scales can  
 54 be recombined, when proper decimation, filtering and interpolation processes are applied to obtain a  
 55 filtered approximation of  $x[n]$  (synthesis phase).

## 56 **Supplementary Information C Parametric modelling of the wood** 57 **response**

58 Please note that in a circular membrane like those pieces of wood used, resonance frequencies are not  
 59 harmonic and depend on the zeros of the first order BESSEL functions, which exhibits a near periodicity  
 60 only for higher modes. Damping of higher modes is very large and the signal is most likely to be obscured  
 61 by noise and its detection is very difficult. Damping due to humidity of absorption of the wood was  
 62 minimised by keeping the relative humidity of the air in the anechoic chamber to less than 28% on  
 63 average. A good approximation of the signal was obtained using a 5<sup>th</sup> order model (two real sinusoids),  
 64 so a linear filter has been defined for the substrate. The main advantage of parametric modelling over  
 65 stationary models (FOURIER techniques or lower-order statistical models) is that an accurate model of  
 66 the signal can be obtained already by using a only a small number of samples (i.e. signals such as non-  
 67 stationary signals e.g. impacts). As a consequence a particular model can be obtained for each substrate  
 68 sample using an excitation signal produced by the ants and this particular model can be applied to  
 69 the same scenario to reduce signal distortion and increase ant signal detection sensitivity, whereas the  
 70 particular substrate remains unchanged. Resonances of the wood may be modelled as a linear system  
 71 that produces a set of exponential damped sinusoids (as given in Equation (3)), contaminated with noise

72 from the acquisition system. Two sinusoids are employed here which cover two vibration modes.

$$x[n] = \sum_{i=1}^M a_i \exp(s_i n) + w[n] \quad (3)$$

73  $x[n]$  is the modelled signal,  $w[n]$  is noise (white: GAUSSIAN, zero mean; and wide-sense stationary [3]),  
 74  $M$  is the model order or number of complex exponentials,  $a_i = |a_i|e^{j\phi_i}$  are complex amplitudes (real  
 75 amplitudes  $|a_i|$  & phase shifts  $\phi_i$ ), and  $s_i = \alpha_i + j2\pi f_i$  are complex parameters ( $\alpha_i$  exponentially damped  
 76 sinusoidal damping coefficients,  $f_i$  normalised frequencies with respect to sampling frequency, i.e. nor-  
 77 malised HERTZ).

78 However, the signals recorded with an accelerometer in the anechoic chamber are non-stationary  
 79 and may be contaminated by distortion or noise. Distortion is due to two sources: a low frequency  
 80 component owing to variations of the reference level of the accelerometer or ant motion and higher  
 81 frequency oscillations of the substrate. Continuous wavelet decomposition enables all relevant signal  
 82 information to be identified in the range of scales 2 – 22, so that removal of higher scales increases the  
 83 signal-to-noise ratio and removal of lower scales reduces the low frequency distortions. Compared to  
 84 other spectral techniques, wavelet processing techniques allows a better treatment of signals with time  
 85 discontinuities and fast changing phenomena, such as impulses. Substrate resonances produces oscillations  
 86 in the recorded signals and are difficult to characterise with analytical models because of the variability  
 87 of the material properties of wood [4]. These oscillations require a broad range of frequencies or scales  
 88 which overlap with ant signal range, so spectral or wavelet filtering would damage the original signal. It  
 89 is possible to separate the excitation of the substrate response if enough of the model (motion) is known  
 90 (e.g. by correlating the action that is measured vibration with a recorded video) and the substrate  
 91 response (resonances) is known. Here, resonances have been modelled as linear systems which produce  
 92 noisy sets of exponential damped sinusoids.

### 93 Analysis of ant vibration signals

**Figure S3. Analysis of signals.** Synthesised response of the model (filtered response, Figure 2 main document) and its de-convoluted signal (extracted excitation) for **A** the scratching sound only (Figure 5B, main document) and **B** the carrying and dropping of a stone (Figure 5C, main document)

94 The excitation signals depicted in Figure S3A and B of the scratching/biting response (Figure 5B,

95 main document) and the stone carrying/dropping response (Figure 5C, main document) show that the  
 96 influence (distortion) of the veneer disc's response has been attenuated at the same time the noise is  
 97 reduced, producing clean excitation signals, previously obscured owing to their weak nature. However,  
 98 the excitation is much more complex and the ant behaviour is not as clear as with the impact model.  
 99 Rather than scratching it is likely that the ant is biting and pulling; while for the stone being dragged  
 100 over the veneer a higher order model with broadband characteristic seems to be necessary as friction is  
 101 likely to be involved [5].

## 102 References

- 103 1. Bies DA, Hansen CH (2009) Engineering Noise Control: Theory and Practice. Spon Press, Abing-  
 104 don.
- 105 2. Fletcher NH, Rossing TD (1998) The physics of musical instruments. Springer-Verlag New York.
- 106 3. Priestley MB (1988) Non-linear and Non-stationary Time Series Analysis. Academic Press, London.
- 107 4. Oberst S, Lai JCS, Evans TA (2013) Novel method for pairing wood samples for choice tests. PLoS  
 108 ONE (accepted for publication, doi 10.1371/journal.pone.0088835).
- 109 5. Akay A (2002) Acoustics of friction. Journal of the Acoustical Society of America 111: 1525-1548.

## List of Figures

|    |                                                                                                                                                                                                                                                                   |   |
|----|-------------------------------------------------------------------------------------------------------------------------------------------------------------------------------------------------------------------------------------------------------------------|---|
| S1 | <b>Experimental setup to measure the mobility of the veneer disc in the ant-box resting on foam.</b> Scanning laser vibrometer (PSV-400); loudspeaker; and ant-box minus rectangular container, Figure 1, main document. . . . .                                  | 1 |
| S2 | <b>Characterisation of veneer discs over mobilities.</b> Mobilities measured for systems <b>1</b> , <b>2</b> and <b>3</b> ; $X_i$ and $Y_i$ stand for the veneer discs' later use as control and treatment sides of system $i = 1, 2, 3$ , respectively . . . . . | 1 |
| S3 | <b>Analysis of signals.</b> Synthesised response of the model and its de-convoluted signal for <b>A</b> the scratching sound only and <b>B</b> the carrying and dropping of a stone . . . . .                                                                     | 4 |
